# Supplementary material for: The Effect of the Proportion of Adjacent Non-Crop Vegetation on Plant and Invertebrate Diversity in the Vineyards of the South Moravian Region
Source: MDPI journal article supplement (doi:10.3390/agronomy11061073), 2021-05-26
Supplement: s1 [file s1]

**Table S1.** Soil nutrient content determined by Mehlich III test method

| Locality            | pH  | N min                  | P                       | K                       | Ca                       |
|---------------------|-----|------------------------|-------------------------|-------------------------|--------------------------|
| Velké Bílovice (NH) | 7.2 | 14 mg.kg <sup>-1</sup> | 121 mg.kg <sup>-1</sup> | 334 mg.kg <sup>-1</sup> | 3046 mg.kg <sup>-1</sup> |
| Bavory-Mikulov (PP) | 7.4 | 9 mg.kg <sup>-1</sup>  | 135 mg.kg <sup>-1</sup> | 357 mg.kg <sup>-1</sup> | 3311 mg.kg <sup>-1</sup> |

**Table S2.** List of all plant species of inter-row vegetation, sorted to families, found at three evaluated vineyards and their appearance on the phytosociological survey plots in all sampling terms

| FAMILY               | CATEGORY | SPECIES                                 | Přední hora (PH) |     |     |     | Nová hora (NH) |     |     |     | Pod Pálavou (PP) |     |     |     | Přední hora (PH) |     |     |     | Nová hora (NH) |     |     |     | Pod Pálavou (PP) |     |     |     |
|----------------------|----------|-----------------------------------------|------------------|-----|-----|-----|----------------|-----|-----|-----|------------------|-----|-----|-----|------------------|-----|-----|-----|----------------|-----|-----|-----|------------------|-----|-----|-----|
|                      |          |                                         | 2018             |     |     |     | 2018           |     |     |     | 2018             |     |     |     | 2019             |     |     |     | 2019           |     |     |     | 2019             |     |     |     |
|                      |          |                                         | JUN              | JUL | AUG | SEP | JUN            | JUL | AUG | SEP | JUN              | JUL | AUG | SEP | JUN              | JUL | AUG | SEP | JUN            | JUL | AUG | SEP | JUN              | JUL | AUG | SEP |
| <i>Amaranthaceae</i> | 3        | <i>Amaranthus retroflexus</i> L.        | ✓                | ✓   | ✓   | ✓   |                |     | ✓   | ✓   |                  |     |     |     | ✓                |     |     |     | ✓              | ✓   |     |     |                  |     |     |     |
|                      | 3        | <i>Atriplex patula</i> L.               | ✓                | ✓   | ✓   |     |                |     | ✓   | ✓   |                  |     |     |     | ✓                |     |     |     | ✓              | ✓   |     |     |                  |     |     |     |
|                      | 3        | <i>Chenopodium album</i> L.             |                  | ✓   |     | ✓   |                | ✓   | ✓   | ✓   |                  |     |     |     | ✓                |     |     |     | ✓              | ✓   |     |     |                  |     |     |     |
| <i>Apiaceae</i>      | 1        | <i>Daucus carota</i> L.                 | ✓                |     |     |     |                |     |     |     |                  |     |     |     |                  |     |     |     |                |     |     |     |                  |     |     |     |
|                      | 1        | <i>Peucedanum alsaticum</i> L.          |                  |     |     |     |                |     |     |     |                  |     |     |     |                  |     |     |     |                |     |     |     |                  | ✓   | ✓   |     |
| <i>Asteraceae</i>    | 2        | <i>Achillea millefolium</i> L.          |                  |     |     |     |                |     |     |     |                  |     |     |     |                  |     |     |     |                |     |     |     | ✓                | ✓   | ✓   | ✓   |
|                      | 3        | <i>Artemisia vulgaris</i> L.            |                  |     |     |     |                |     |     |     | ✓                | ✓   | ✓   |     |                  |     |     |     |                |     |     |     | ✓                | ✓   | ✓   | ✓   |
|                      | 2        | <i>Cichorium intybus</i> L.             |                  |     |     |     |                |     |     |     | ✓                |     |     |     |                  |     |     |     |                |     |     |     |                  |     |     |     |
|                      | 3        | <i>Cirsium arvense</i> (L.) Scop        |                  | ✓   | ✓   | ✓   |                |     |     |     |                  |     |     |     | ✓                | ✓   | ✓   |     |                | ✓   |     |     | ✓                |     |     |     |
|                      | 2        | <i>Conyza canadensis</i> (L.) Cronquist |                  |     |     |     |                |     |     |     | ✓                | ✓   | ✓   | ✓   | ✓                |     |     |     | ✓              |     |     |     | ✓                | ✓   | ✓   | ✓   |
|                      | 2        | <i>Crepis tectorum</i> L.               |                  |     |     |     |                | ✓   | ✓   |     | ✓                | ✓   | ✓   | ✓   |                  |     |     |     |                |     |     |     | ✓                | ✓   | ✓   |     |
|                      | 2        | <i>Crepis biennis</i> L.                |                  |     |     |     |                |     |     |     |                  |     |     |     |                  |     |     |     |                |     |     |     | ✓                | ✓   | ✓   | ✓   |

|                        |   |                                                                                |   |   |   |   |   |   |   |   |   |   |   |   |   |   |   |   |   |
|------------------------|---|--------------------------------------------------------------------------------|---|---|---|---|---|---|---|---|---|---|---|---|---|---|---|---|---|
|                        | 2 | <i>Erigeron annuus</i><br>(L.) Pers.                                           |   |   |   |   | ✓ | ✓ | ✓ | ✓ |   |   |   |   | ✓ |   |   |   |   |
|                        | 3 | <i>Lactuca serriola</i> L.                                                     | ✓ | ✓ | ✓ | ✓ | ✓ | ✓ |   |   | ✓ | ✓ |   |   | ✓ | ✓ |   |   |   |
|                        | 2 | <i>Sonchus oleraceus</i><br>L.                                                 |   |   |   | ✓ |   |   |   |   |   |   |   |   |   |   |   |   |   |
|                        | 3 | <i>Taraxacum officinale</i> G.H.<br>Weber ex<br>Wiggers                        | ✓ | ✓ | ✓ | ✓ | ✓ | ✓ |   | ✓ |   | ✓ |   | ✓ | ✓ | ✓ |   |   |   |
|                        | 1 | <i>Tragopogon pratensis</i> L.                                                 |   |   |   |   | ✓ |   |   |   |   |   |   |   | ✓ |   |   |   |   |
|                        | 2 | <i>Tripleurospermum inodorum</i> (L.)<br>Sch.Bip.                              | ✓ | ✓ | ✓ |   | ✓ | ✓ | ✓ | ✓ |   | ✓ | ✓ | ✓ | ✓ |   |   |   |   |
| <i>Boraginaceae</i>    | 1 | <i>Echium vulgare</i> L.                                                       |   |   |   |   | ✓ | ✓ |   | ✓ |   |   |   |   |   | ✓ |   |   |   |
| <i>Brassicaceae</i>    | 2 | <i>Capsella bursa-pastoris</i> (L.) Med.                                       |   |   |   | ✓ | ✓ | ✓ | ✓ |   |   |   |   |   |   |   |   |   |   |
| <i>Caryophyllaceae</i> | 1 | <i>Arenaria serpyllifolia</i> L.                                               |   |   |   |   |   | ✓ | ✓ | ✓ | ✓ |   |   |   | ✓ | ✓ | ✓ |   |   |
|                        | 2 | <i>Silene latifolia</i><br>subsp. <i>alba</i><br>(Miller) Greuter<br>et Burdet |   |   |   |   |   |   | ✓ | ✓ |   | ✓ |   |   |   | ✓ | ✓ | ✓ |   |
|                        | 1 | <i>Stellaria media</i> (L.)<br>Vill.                                           | ✓ |   |   |   | ✓ |   |   | ✓ |   | ✓ |   | ✓ | ✓ |   |   |   |   |
| <i>Convolvulaceae</i>  | 3 | <i>Convolvulus arvensis</i> L.                                                 | ✓ | ✓ | ✓ | ✓ | ✓ | ✓ | ✓ | ✓ | ✓ | ✓ | ✓ | ✓ | ✓ | ✓ | ✓ | ✓ |   |
| <i>Fabaceae</i>        | 1 | <i>Astragalus cicer</i> L.                                                     |   |   |   |   |   |   | ✓ | ✓ | ✓ | ✓ |   |   |   | ✓ | ✓ | ✓ | ✓ |
|                        | 1 | <i>Astragalus glycyphyllos</i> L.                                              |   |   |   |   |   |   | ✓ |   |   |   |   |   |   | ✓ | ✓ |   |   |
|                        | 1 | <i>Lathyrus tuberosus</i><br>L.                                                |   |   |   |   |   |   | ✓ |   |   |   |   |   |   | ✓ |   |   |   |
|                        | 1 | <i>Medicago lupulina</i><br>L.                                                 | ✓ | ✓ |   |   |   |   |   |   |   |   |   |   |   | ✓ |   | ✓ |   |
|                        | 1 | <i>Onobrychis viciifolia</i> Scop.                                             | ✓ | ✓ | ✓ | ✓ |   |   |   |   |   |   |   |   |   |   |   |   |   |
|                        | 1 | <i>Trifolium pratense</i><br>L.                                                | ✓ | ✓ | ✓ | ✓ |   |   |   |   | ✓ |   |   |   |   |   |   |   |   |
|                        | 2 | <i>Trifolium repens</i> L.                                                     | ✓ | ✓ | ✓ | ✓ |   |   |   | ✓ |   |   |   |   |   |   |   |   |   |

|                     |   |                                           |               |               |               |               |               |               |           |
|---------------------|---|-------------------------------------------|---------------|---------------|---------------|---------------|---------------|---------------|-----------|
|                     | 1 | <i>Trifolium incarnatum</i> L.            | ✓             |               |               |               |               |               |           |
|                     | 1 | <i>Vicia angustifolia</i> L.              |               |               | ✓             |               |               |               | ✓         |
| <i>Geraniaceae</i>  | 1 | <i>Eroidium cicutarium</i> (L.)L'Hér.     |               | ✓             |               |               |               | ✓             |           |
|                     | 1 | <i>Geranium pusillum</i> Burm.fil.        |               | ✓   ✓   ✓   ✓ | ✓   ✓         |               | ✓   ✓   ✓   ✓ | ✓             |           |
| <i>Hypericaceae</i> | 2 | <i>Hypericum perforatum</i> L.            |               |               |               |               |               |               | ✓   ✓     |
| <i>Lamiaceae</i>    | 2 | <i>Ballota nigra</i> L.                   | ✓             |               |               |               |               |               |           |
|                     | 1 | <i>Glechoma hederacea</i> L.              |               |               | ✓   ✓         |               |               |               |           |
|                     | 1 | <i>Acinos arvensis</i> (Lam.) Dandy       |               |               |               |               |               |               | ✓   ✓   ✓ |
| <i>Malvaceae</i>    | 1 | <i>Malva neglecta</i> Wallr.              |               | ✓   ✓   ✓     |               |               |               |               |           |
| <i>Papaveraceae</i> | 2 | <i>Fumaria officinalis</i> L.             |               |               |               |               |               |               | ✓         |
| <i>Poaceae</i>      | 2 | <i>Bromus arvensis</i> L.                 |               |               | ✓   ✓         |               |               |               |           |
|                     | 2 | <i>Bromus hordeaceus</i> L.               |               | ✓   ✓         |               |               |               |               |           |
|                     | 2 | <i>Bromus sterilis</i> L.                 | ✓             | ✓   ✓         | ✓   ✓   ✓     | ✓   ✓   ✓     | ✓   ✓         | ✓   ✓         |           |
|                     | 2 | <i>Dactylis glomerata</i> L.              |               |               | ✓   ✓   ✓   ✓ |               |               |               | ✓   ✓     |
|                     | 3 | <i>Echinochloa crus-galli</i> (L.) P.B.   | ✓             | ✓   ✓         |               |               |               |               |           |
|                     | 2 | <i>Elytrigia intermedia</i> (Host) Nevski |               |               | ✓   ✓   ✓   ✓ |               |               |               |           |
|                     | 2 | <i>Festuca pratensis</i> Huds.            |               | ✓   ✓   ✓     |               |               | ✓             |               |           |
|                     | 2 | <i>Hordeum murinum</i> L.                 | ✓   ✓   ✓   ✓ | ✓   ✓   ✓     |               | ✓   ✓   ✓     | ✓   ✓   ✓   ✓ |               |           |
|                     | 3 | <i>Lolium perenne</i> L.                  | ✓   ✓   ✓   ✓ | ✓   ✓   ✓   ✓ | ✓   ✓   ✓   ✓ | ✓   ✓   ✓   ✓ | ✓   ✓   ✓   ✓ | ✓   ✓   ✓   ✓ |           |
|                     | 2 | <i>Poa pratensis</i> L.                   | ✓   ✓         | ✓   ✓   ✓     | ✓             |               |               |               |           |
|                     | 2 | <i>Poa annua</i> L.                       |               | ✓             |               |               |               |               |           |

|                |   |                                               |         |     |         |         |       |         |
|----------------|---|-----------------------------------------------|---------|-----|---------|---------|-------|---------|
|                | 2 | <i>Setaria pumila</i> (Poir.) Roem et Schult. |         | ✓ ✓ |         |         | ✓ ✓   |         |
|                | 2 | <i>Setaria viridis</i> (L.) P. B.             |         |     | ✓ ✓     |         |       | ✓ ✓     |
| Polygonaceae   | 1 | <i>Polygonum aviculare</i> L.                 | ✓ ✓ ✓ ✓ | ✓   | ✓ ✓     | ✓ ✓ ✓ ✓ | ✓ ✓ ✓ | ✓ ✓ ✓   |
|                | 3 | <i>Rumex crispus</i> L.                       |         | ✓   |         |         | ✓     |         |
| Portulacaceae  | 2 | <i>Portulaca oleraceae</i> L.                 |         |     |         |         | ✓ ✓   |         |
| Plantaginaceae | 2 | <i>Linaria vulgaris</i> Mill.                 |         |     | ✓ ✓ ✓ ✓ |         |       | ✓ ✓ ✓ ✓ |
|                | 3 | <i>Plantago lanceolata</i> L.                 | ✓ ✓     |     |         | ✓ ✓ ✓   |       |         |
|                | 3 | <i>Plantago major</i> L.                      | ✓ ✓ ✓   |     |         | ✓ ✓     |       |         |
|                | 1 | <i>Veronica hederifolia</i> L.                |         |     | ✓       | ✓       | ✓     |         |
| Ranunculaceae  | 1 | <i>Clematis</i> sp.                           |         |     | ✓ ✓ ✓ ✓ |         |       | ✓       |
| Rosaceae       | 1 | <i>Geum urbanum</i> L.                        |         |     |         |         |       | ✓       |
|                | 2 | <i>Rosa</i> sp.                               |         |     |         |         |       | ✓ ✓     |
| Violaceae      | 2 | <i>Viola arvensis</i> L.                      |         |     |         |         |       | ✓       |

**Table S3.** All insects, resp. spiders, found at three evaluated localities, sorted to families and their occurrence in inter-row sampling plot (two-year average)

[illegible]

|                   |                 |     |    |    |    |     |    |    |    |    |    |    |    |
|-------------------|-----------------|-----|----|----|----|-----|----|----|----|----|----|----|----|
|                   | Chrysomelidae   | +   | +  | +  | -  | +   | +  | +  | +  | +  | +  | +  | -  |
|                   | Melyridae       | +   | -  | -  | -  | +   | -  | -  | -  | +  | +  | -  | -  |
|                   | Nitidulidae     | +   | -  | -  | +  | +   | -  | -  | -  | -  | -  | -  | -  |
|                   | Phalacridae     | -   | -  | -  | -  | +   | -  | -  | -  | -  | -  | -  | -  |
|                   | Scarabaidae     | +   | -  | -  | -  | -   | -  | -  | -  | -  | -  | -  | -  |
|                   | Scirtidae       | +   | +  | +  | +  | +   | +  | +  | +  | +  | +  | +  | +  |
|                   | Staphylinidae   | +   | -  | -  | -  | -   | -  | -  | -  | -  | -  | -  | -  |
| <b>DERMAPTERA</b> | Forficulidae    | +   | +  | -  | -  | -   | -  | -  | -  | -  | -  | -  | -  |
| <b>DIPTERA</b>    | Asilidae        | -   | -  | +  | -  | +   | -  | -  | -  | +  | +  | +  | -  |
|                   | Drosophilidae   | +++ | ++ | ++ | ++ | +++ | +  | ++ | ++ | ++ | ++ | +  | ++ |
|                   | Chloropidae     | +   | +  | ++ | +  | +   | +  | +  | +  | +  | ++ | ++ | +  |
|                   | Micropezidae    | +   | -  | -  | -  | -   | -  | -  | -  | -  | -  | -  | -  |
|                   | Muscidae        | ++  | +  | +  | +  | ++  | +  | +  | +  | +  | +  | +  | +  |
|                   | Opomyzidae      | +   | -  | -  | -  | +   | -  | -  | -  | -  | -  | -  | -  |
|                   | Pipunculidae    | -   | -  | +  | -  | -   | +  | -  | +  | +  | +  | +  | +  |
|                   | Phoridae        | -   | -  | -  | +  | -   | -  | -  | +  | -  | -  | -  | -  |
|                   | Sciaridae       | -   | -  | -  | -  | -   | -  | -  | +  | -  | -  | -  | -  |
|                   | Stratimyidae    | -   | -  | -  | -  | +   | -  | +  | -  | -  | -  | -  | -  |
|                   | Syrphidae       | +   | +  | +  | +  | +   | -  | +  | -  | +  | +  | -  | +  |
|                   | Tephritidae     | -   | -  | -  | -  | +   | +  | -  | -  | -  | -  | -  | -  |
| <b>HEMIPTERA</b>  | Anthocoridae    | +   | +  | +  | +  | +   | +  | -  | -  | +  | -  | -  | -  |
|                   | Aphidodea       | ++  | +  | +  | +  | +++ | +  | +  | -  | ++ | +  | +  | +  |
|                   | Auchenorrhyncha | -   | -  | +  | -  | -   | -  | -  | -  | +  | +  | +  | +  |
|                   | Cicadellidae    | +   | ++ | +  | ++ | ++  | ++ | ++ | +  | ++ | ++ | ++ | ++ |
|                   | Dictopharidae   | -   | -  | -  | -  | -   | -  | -  | -  | -  | -  | +  | -  |
|                   | Membracidae     | -   | +  | -  | -  | -   | -  | -  | -  | -  | -  | -  | -  |
|                   | Miridae         | +   | +  | +  | +  | +   | +  | +  | -  | +  | +  | +  | +  |
|                   | Nabidae         | -   | +  | +  | +  | +   | +  | +  | +  | +  | +  | +  | -  |
|                   | Pentatomidae    | +   | +  | +  | -  | +   | -  | -  | -  | -  | +  | -  | -  |

|              |                    |   |   |   |   |    |   |   |   |    |    |   |   |
|--------------|--------------------|---|---|---|---|----|---|---|---|----|----|---|---|
|              | Psylloidea         | + | - | + | - | -  | + | + | - | -  | -  | + | + |
|              | Pyrrocoridae       | - | - | - | - | -  | - | - | + | -  | -  | - | - |
| HYMENOPTERA  | Apidae             | - | - | - | - | -  | - | - | - | -  | -  | - | + |
|              | Braconidae         | + | + | + | + | +  | + | + | + | ++ | +  | + | + |
|              | Formicidae         | + | + | + | + | ++ | + | + | + | ++ | ++ | + | + |
|              | Chalcidoidea       | - | + | - | + | +  | - | - | - | +  | +  | - | + |
|              | Ichneumonidae      | + | + | + | + | +  | - | + | + | +  | -  | + | + |
|              | Tephritidae        | - | - | - | - | -  | - | - | - | -  | +  | - | - |
|              | Epermeniidae       | + | - | + | - | -  | - | - | - | -  | -  | - | - |
|              | not specified      | - | + | - | - | +  | - | - | - | -  | +  | - | - |
| NEUROPTERA   | Hemerobiidae       | - | + | - | - | -  | - | - | - | -  | -  | - | - |
| ORTHOPTERA   | suborder Cealifera | + | - | - | - | +  | + | - | - | +  | +  | + | + |
|              | suborder Ensifera  | + | - | + | - | +  | + | + | + | +  | +  | + | + |
| THYSANOPTERA | not specified      | - | - | - | - | -  | - | - | - | +  | -  | + | - |

#### EXPLANATORY NOTES

|     |                                                                |
|-----|----------------------------------------------------------------|
| -   | No occurrence                                                  |
| +   | Two-year average less than 10 individuals per sampling plot    |
| ++  | Two-year average between 10 – 50 individuals per sampling plot |
| +++ | Two-year average higher than 50 individuals per sampling plot  |
